# Supplementary material for: A re-examination of the enigmatic Russian tetrapod &lt;i&gt;Phreatophasma aenigmaticum&lt;/i&gt; and its evolutionary implications
Source: Copernicus journal article supplement (doi:10.5194/fr-20-87-2017), 2017-02-21
Supplement: Supplementary file [file fr-20-87-2017-supplement-title-page.pdf › fr-20-87-2017-supplement-title-page.pdf]

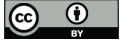

*Supplement of*

**A re-examination of the enigmatic Russian tetrapod *Phreatophasma aenigmaticum* and its evolutionary implications**

**Neil Brocklehurst and Jörg Fröbisch**

*Correspondence to:* Neil Brocklehurst ([neil.brocklehurst@mf-n-berlin.de](mailto:neil.brocklehurst@mf-n-berlin.de))

- [fr-20-87-2017-supplement-title-page.pdf](#)
- [Supplement 1.tre](#)
- [Supplement 2.tnt](#)
- [Supplement 3.tnt](#)

The copyright of individual parts of the supplement might differ from the CC-BY 3.0 licence.
